# Supplementary material
Source: publisher figshare collection journal article supplement (https://frontiersin.figshare.com/ndownloader/files/15014891)
Supplement: Supplementary file 1 [file 15014891]

Supplementary Material

Disequilibrium in trait-climate relationships of trees and birds

Brody Sandel

*** Correspondence:** Brody Sandel: bsandel@scu.edu

## Supplementary references

Adler, P.B., Salguero-Gómez, R., Compagnoni, A., Hsu, J.S., Ray-Mukherjee, J., Mbeau-Ache, C. and Franco, M., 2014. Functional traits explain variation in plant life history strategies. *Proceedings of the National Academy of Sciences*, *111*(2), pp.740-745.

Adriaenssens S. (2012). Dry deposition and canopy exchange for temperate tree species under high nitrogen deposition. PhD thesis, Ghent University, Ghent, Belgium, 209p.

Atkin, O.K., Bloomfield, K.J., Reich, P.B., Tjoelker, M.G., Asner, G.P., Bonal, D., Bönisch, G., Bradford, M.G., Cernusak, L.A., Cosio, E.G. and Creek, D., 2015. Global variability in leaf respiration in relation to climate, plant functional types and leaf traits. *New Phytologist*, *206*(2), pp.614-636.

Auger, S. and Shipley, B., 2013. Inter‐specific and intra‐specific trait variation along short environmental gradients in an old‐growth temperate forest. *Journal of Vegetation Science*, *24*(3), pp.419-428.

Blonder, B., Buzzard, V., Simova, I., Sloat, L., Boyle, B., Lipson, R., Aguilar‐Beaucage, B., Andrade, A., Barber, B., Barnes, C. and Bushey, D., 2012. The leaf‐area shrinkage effect can bias paleoclimate and ecology research. *American Journal of Botany*, *99*(11), pp.1756-1763.

Blonder, B., Violle, C. and Enquist, B.J., 2013. Assessing the causes and scales of the leaf economics spectrum using venation networks in Populus tremuloides. *Journal of Ecology*, *101*(4), pp.981-989.

Blonder, B., Violle, C., Bentley, L.P. and Enquist, B.J., 2011. Venation networks and the origin of the leaf economics spectrum. *Ecology letters*, *14*(2), pp.91-100.

Bond-Lamberty, B., Wang, C. and Gower, S.T., 2002. Aboveground and belowground biomass and sapwood area allometric equations for six boreal tree species of northern Manitoba. *Canadian Journal of Forest Research*, *32*(8), pp.1441-1450.

Bragazza, L., 2009. Conservation priority of Italian Alpine habitats: a floristic approach based on potential distribution of vascular plant species. *Biodiversity and conservation*, *18*(11), pp.2823-2835.

Choat, B., Jansen, S., Brodribb, T.J., Cochard, H., Delzon, S., Bhaskar, R., Bucci, S.J., Feild, T.S., Gleason, S.M., Hacke, U.G. and Jacobsen, A.L., 2012. Global convergence in the vulnerability of forests to drought. *Nature*, *491*(7426), p.752.

Butterfield, B.J. and Briggs, J.M., 2011. Regeneration niche differentiates functional strategies of desert woody plant species. *Oecologia*, *165*(2), pp.477-487.

Castro-Diez, P., Puyravaud, J.P., Cornelissen, J.H.C. and Villar-Salvador, P., 1998. Stem anatomy and relative growth rate in seedlings of a wide range of woody plant species and types. *Oecologia*, *116*(1-2), pp.57-66.

Cavender-Bares, J., Keen, A. and Miles, B., 2006. Phylogenetic structure of Floridian plant communities depends on taxonomic and spatial scale. *Ecology*, *87*(sp7), pp.S109-S122.

Chave, J., Coomes, D., Jansen, S., Lewis, S.L., Swenson, N.G. and Zanne, A.E., 2009. Towards a worldwide wood economics spectrum. *Ecology letters*, *12*(4), pp.351-366.

Ciocarlan V. (2009). The illustrated Flora of Romania. Pteridophyta et Spermatopyta. Editura Ceres, 1141 p (in Romanian).

Cornelissen, J.H.C., 1996. An experimental comparison of leaf decomposition rates in a wide range of temperate plant species and types. *Journal of Ecology*, pp.573-582.

Cornelissen, J.H.C., Cerabolini, B., Castro‐Díez, P., Villar‐Salvador, P., Montserrat‐Martí, G., Puyravaud, J.P., Maestro, M., Werger, M.J.A. and Aerts, R., 2003. Functional traits of woody plants: correspondence of species rankings between field adults and laboratory‐grown seedlings?. *Journal of Vegetation Science*, *14*(3), pp.311-322.

Craine, J.M., Elmore, A.J., Aidar, M.P., Bustamante, M., Dawson, T.E., Hobbie, E.A., Kahmen, A., Mack, M.C., McLauchlan, K.K., Michelsen, A. and Nardoto, G.B., 2009. Global patterns of foliar nitrogen isotopes and their relationships with climate, mycorrhizal fungi, foliar nutrient concentrations, and nitrogen availability. *New Phytologist*, *183*(4), pp.980-992.

Craven, D., Braden, D., Ashton, M.S., Berlyn, G.P., Wishnie, M. and Dent, D., 2007. Between and within-site comparisons of structural and physiological characteristics and foliar nutrient content of 14 tree species at a wet, fertile site and a dry, infertile site in Panama. *Forest Ecology and Management*, *238*(1-3), pp.335-346.

Diaz, S., Hodgson, J.G., Thompson, K., Cabido, M., Cornelissen, J.3., Jalili, A., Montserrat‐Marti, G., Grime, J.P., Zarrinkamar, F., Asri, Y. and Band, S.R., 2004. The plant traits that drive ecosystems: evidence from three continents. *Journal of vegetation science*, *15*(3), pp.295-304.

Fitter, A.H. and Peat, H.J., 1994. The ecological flora database. *Journal of Ecology*, *82*(2), pp.415-425.

Freschet, G.T., Cornelissen, J.H., Van Logtestijn, R.S. and Aerts, R., 2010. Evidence of the ‘plant economics spectrum’ in a subarctic flora. *Journal of Ecology*, *98*(2), pp.362-373.

Green, W. 2009. USDA PLANTS Compilation, version 1, 09-02-02. (http://bricol.net/downloads/data/PLANTSdatabase/) NRCS: The PLANTS Database (http://plants.usda.gov, 1 Feb 2009). National Plant Data Center: Baton Rouge, LA 70874-74490 USA.

Hill, M.O., Preston, C.D. and Roy, D.B. 2004. PLANTATT – attributes of British and Irish Plants: status, size, life history, geography and habitats. Huntingdon: Centre for Ecology and Hydrology.

Powers, J.S. and Tiffin, P., 2010. Plant functional type classifications in tropical dry forests in Costa Rica: leaf habit versus taxonomic approaches. *Functional Ecology*, *24*(4), pp.927-936.

Kattge, J., Knorr, W., Raddatz, T. and Wirth, C., 2009. Quantifying photosynthetic capacity and its relationship to leaf nitrogen content for global‐scale terrestrial biosphere models. *Global Change Biology*, *15*(4), pp.976-991.

Kleyer, M., Bekker, R.M., Knevel, I.C., Bakker, J.P., Thompson, K., Sonnenschein, M., Poschlod, P., Van Groenendael, J.M., Klimeš, L., Klimešová, J. and Klotz, S.R.G.M., 2008. The LEDA Traitbase: a database of life‐history traits of the Northwest European flora. *Journal of Ecology*, *96*(6), pp.1266-1274.

Laughlin, D.C., Leppert, J.J., Moore, M.M. and Sieg, C.H., 2010. A multi‐trait test of the leaf‐height‐seed plant strategy scheme with 133 species from a pine forest flora. *Functional Ecology*, *24*(3), pp.493-501.

Laughlin, D.C., Fulé, P.Z., Huffman, D.W., Crouse, J. and Laliberté, E., 2011. Climatic constraints on trait‐based forest assembly. *Journal of Ecology*, *99*(6), pp.1489-1499.

Lukeš, P., Stenberg, P., Rautiainen, M., Mõttus, M. and Vanhatalo, K.M., 2013. Optical properties of leaves and needles for boreal tree species in Europe. *Remote Sensing Letters*, *4*(7), pp.667-676.

Malhado, A.C.M., Malhi, Y., Whittaker, R.J., Ladle, R.J., Ter Steege, H., Aragao, L.E.O., Quesada, C.A., Araujo-Murakami, A., Phillips, O.L., Peacock, J. and Lopez-Gonzalez, G., 2009. Spatial trends in leaf size of Amazonian rainforest trees.

Medlyn, B.E., Badeck, F.W., De Pury, D.G.G., Barton, C.V.M., Broadmeadow, M., Ceulemans, R., De Angelis, P., Forstreuter, M., Jach, M.E., Kellomäki, S. and Laitat, E., 1999. Effects of elevated [CO2] on photosynthesis in European forest species: a meta‐analysis of model parameters. *Plant, Cell & Environment*, *22*(12), pp.1475-1495.

Meir, P., Kruijt, B., Broadmeadow, M., Barbosa, E., Kull, O., Carswell, F., Nobre, A. and Jarvis, P.G., 2002. Acclimation of photosynthetic capacity to irradiance in tree canopies in relation to leaf nitrogen concentration and leaf mass per unit area. *Plant, Cell & Environment*, *25*(3), pp.343-357.

Mencuccini, M., 2003. The ecological significance of long‐distance water transport: short‐term regulation, long‐term acclimation and the hydraulic costs of stature across plant life forms. *Plant, Cell & Environment*, *26*(1), pp.163-182.

Michaletz, S.T. and Johnson, E.A., 2006. A heat transfer model of crown scorch in forest fires. *Canadian Journal of Forest Research*, *36*(11), pp.2839-2851.

Milla, R. and Reich, P.B., 2011. Multi-trait interactions, not phylogeny, fine-tune leaf size reduction with increasing altitude. *Annals of Botany*, *107*(3), pp.455-465.

Ordonez, J.C., van Bodegom, P.M., Witte, J.P.M., Bartholomeus, R.P., van Hal, J.R. and Aerts, R., 2009. Plant strategies in relation to resource supply in mesic to wet environments: does theory mirror nature?. *The American Naturalist*, *175*(2), pp.225-239.

Paula, S., Arianoutsou, M., Kazanis, D., Tavsanoglu, Ç., Lloret, F., Buhk, C., Ojeda, F., Luna, B., Moreno, J.M., Rodrigo, A. and Espelta, J.M., 2009. Fire‐related traits for plant species of the Mediterranean Basin. *Ecology*, *90*(5), pp.1420-1420.

Prentice, I.C., Meng, T., Wang, H., Harrison, S.P., Ni, J. and Wang, G., 2011. Evidence of a universal scaling relationship for leaf CO2 drawdown along an aridity gradient. *New Phytologist*, *190*(1), pp.169-180.

Preston, K.A., Cornwell, W.K. and DeNoyer, J.L., 2006. Wood density and vessel traits as distinct correlates of ecological strategy in 51 California coast range angiosperms. *New Phytologist*, *170*(4), pp.807-818.

Price, C.A. and Enquist, B.J., 2007. Scaling mass and morphology in leaves: an extension of the WBE model. *Ecology*, *88*(5), pp.1132-1141.

Quested, H.M., Cornelissen, J.H.C., Press, M.C., Callaghan, T.V., Aerts, R., Trosien, F., Riemann, P., Gwynn-Jones, D., Kondratchuk, A. and Jonasson, S.E., 2003. Decomposition of sub‐arctic plants with differing nitrogen economies: a functional role for hemiparasites. *Ecology*, *84*(12), pp.3209-3221.

Scherer-Lorenzen, M., Schulze, E.D., Don, A., Schumacher, J. and Weller, E., 2007. Exploring the functional significance of forest diversity: a new long-term experiment with temperate tree species (BIOTREE). *Perspectives in Plant Ecology, Evolution and Systematics*, *9*(2), pp.53-70.

Schweingruber, F.H., Landolt, W.: The Xylem Database. Swiss Federal Research Institute WSL Updated (2005)

Shipley, B., 2002. Trade‐offs between net assimilation rate and specific leaf area in determining relative growth rate: relationship with daily irradiance. *Functional ecology*, *16*(5), pp.682-689.

Shipley, B. and Vu, T.T., 2002. Dry matter content as a measure of dry matter concentration in plants and their parts. *New Phytologist*, *153*(2), pp.359-364.

Gachet, S., Véla, E. and Tatoni, T., 2005. BASECO: a floristic and ecological database of Mediterranean French flora. *Biodiversity & Conservation*, *14*(4), pp.1023-1034.

Vergutz, L., S. Manzoni, A. Porporato, R.F. Novais, and R.B. Jackson. 2012. A Global Database of Carbon and Nutrient Concentrations of Green and Senesced Leaves. Data set. Available on-line [http://daac.ornl.gov] from Oak Ridge National Laboratory Distributed Active Archive Center, Oak Ridge, Tennessee, U.S.A. http://dx.doi.org/10.3334/ORNLDAAC/1106

Von Holle, B. and Simberloff, D., 2004. Testing Fox's assembly rule: does plant invasion depend on recipient community structure?. *Oikos*, *105*(3), pp.551-563.

Han, W., Chen, Y., Zhao, F.J., Tang, L., Jiang, R. and Zhang, F., 2012. Floral, climatic and soil pH controls on leaf ash content in China's terrestrial plants. *Global Ecology and Biogeography*, *21*(3), pp.376-382.

Wilson, K.B., Baldocchi, D.D. and Hanson, P.J., 2000. Spatial and seasonal variability of photosynthetic parameters and their relationship to leaf nitrogen in a deciduous forest. *Tree Physiology*, *20*(9), pp.565-578.

Wirth, C. and Lichstein, J.W., 2009. The Imprint of Species Turnover on Old-Growth Forest Carbon Balances-Insights From a Trait-Based Model of Forest Dynamics. In *Old-growth forests* (pp. 81-113). Springer, Berlin, Heidelberg.

Wright, I.J., Ackerly, D.D., Bongers, F., Harms, K.E., Ibarra-Manriquez, G., Martinez-Ramos, M., Mazer, S.J., Muller-Landau, H.C., Paz, H., Pitman, N.C. and Poorter, L., 2006. Relationships among ecologically important dimensions of plant trait variation in seven Neotropical forests. *Annals of Botany*, *99*(5), pp.1003-1015.

Wright, I.J., Reich, P.B., Westoby, M., Ackerly, D.D., Baruch, Z., Bongers, F., Cavender-Bares, J., Chapin, T., Cornelissen, J.H., Diemer, M. and Flexas, J., 2004. The worldwide leaf economics spectrum. *Nature*, *428*(6985), p.821.

Xu, L. and Baldocchi, D.D., 2003. Seasonal trends in photosynthetic parameters and stomatal conductance of blue oak (Quercus douglasii) under prolonged summer drought and high temperature. *Tree physiology*, *23*(13), pp.865-877.

Chen, Y., Han, W., Tang, L., Tang, Z. and Fang, J., 2013. Leaf nitrogen and phosphorus concentrations of woody plants differ in responses to climate, soil and plant growth form. *Ecography*, *36*(2), pp.178-184.
